# Supplementary material for: NEUROlogical Prognosis After Cardiac Arrest in Kids (NEUROPACK) study: protocol for a prospective multicentre clinical prediction model derivation and validation study in children after cardiac arrest
Source: PubMed Central journal article supplement (PMC7520830; doi:10.1136/bmjopen-2020-037517), 2020-09-25
Supplement: bmjopen-2020-037517supp002.pdf [file bmjopen-2020-037517supp002.pdf]

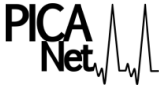

## Paediatric Intensive Care Audit Network · Custom Audit

NET-PACK 3

NET-PACK 3: PICANet evaluation of post cardiac arrest care in kids

Please complete for **all PIC admissions following cardiac arrest** (include both out-of-hospital and in-hospital arrests)**Patient details (or hospital label)**

|                                                                                                                                                  |                                                                                                                                                                                                                                                                         |
|--------------------------------------------------------------------------------------------------------------------------------------------------|-------------------------------------------------------------------------------------------------------------------------------------------------------------------------------------------------------------------------------------------------------------------------|
| <b>Family name</b><br><input type="text"/>                                                                                                       | <b>NHS/CHI/H&amp;C number</b><br><input type="text"/> <input type="text"/> |
| <b>First name</b><br><input type="text"/>                                                                                                        | <b>Case note number</b><br><input type="text"/> <input type="text"/>                            |
| <b>Postcode</b><br><input type="text"/> <input type="text"/> <input type="text"/> <input type="text"/> <input type="text"/> <input type="text"/> | <b>Date of birth (dd/mm/yyyy)</b><br><input type="text"/> <input type="text"/> / <input type="text"/> <input type="text"/> / <input type="text"/> <input type="text"/> <input type="text"/> <input type="text"/> <input type="text"/> <input type="text"/>              |

**History at admission****FOR OUT-OF-HOSPITAL CARDIAC ARREST ONLY:**  
Bystander CPR attempted? Yes  No  UnknownDid CPR continue after arrival to the Emergency Department? Yes  No  Unknown**FOR IN AND OUT-OF-HOSPITAL CARDIAC ARREST:**

First monitored cardiac rhythm during cardiac arrest

- |                                                        |                                                                |
|--------------------------------------------------------|----------------------------------------------------------------|
| <input type="checkbox"/> Asystole                      | } if rhythm detected by ECG                                    |
| <input type="checkbox"/> Sinus bradycardia < 60 bpm    |                                                                |
| <input type="checkbox"/> Pulseless electrical activity |                                                                |
| <input type="checkbox"/> Ventricular fibrillation      |                                                                |
| <input type="checkbox"/> Ventricular tachycardia       | } if rhythm detected by automated external defibrillator (AED) |
| <input type="checkbox"/> Shockable                     |                                                                |
| <input type="checkbox"/> Non-shockable                 |                                                                |
| <input type="checkbox"/> No monitoring                 |                                                                |
| <input type="checkbox"/> Unknown                       |                                                                |

Time from observed cardiac arrest to start of sustained return of spontaneous circulation (ROSC)

 hours  minutes

Number of doses of epinephrine from initial resuscitation to start of period of sustained ROSC

**Temperature management**

Core body temperature management during first 24 hours after sustained ROSC

- Active Normothermia (35 to 37.9 °C)
- Active Therapeutic Hypothermia (32 to <35 °C)
- Other (state below)
- No active temperature control
- Unknown

Duration of initial active temperature control management (if temperature actively managed)

 hours

Minimum temperature recorded during first 24 hours

 .  °C

Maximum temperature recorded during first 24 hours

 .  °C**Comments****Form completed by****Contact us: picanet@leeds.ac.uk**

**Sophie Butler**  
Project officer  
(0113) 343 8125  
s.butler1@leeds.ac.uk

**Lee Norman**  
Database manager  
(0113) 343 8125  
l.j.norman@leeds.ac.uk

**Caroline Lamming**  
Research nurse  
(0116) 252 5414  
crl4@leicester.ac.uk
